# Supplementary material
Source: publisher figshare collection journal article supplement (https://acs.figshare.com/ndownloader/files/14393780)
Supplement: Supplementary file 1 [file 14393780]

# Optimized fragmentation improves the identification of peptides cross-linked using MS-cleavable reagents

Christian E. Stiegert<sup>†</sup>, Philipp Doppler<sup>†</sup>, Karl Mechtler<sup>†¶§</sup>

<sup>†</sup> Institute of Molecular Pathology (IMP), Vienna BioCenter (VBC), Vienna, Austria

<sup>¶</sup> Institute of Molecular Biotechnology, Austrian Academy of Sciences, Vienna BioCenter (VBC), Vienna, Austria

<sup>§</sup> Gregor Mendel Institute (GMI), Austrian Academy of Sciences, Vienna BioCenter (VBC), Vienna, Austria

## Table of Contents

**Supplementary Methods:** Analysis parameters used for MeroX, MS-acquisition and analysis parameters used for DSBU samples, MS- acquisition and analysis parameters used for shotgun analysis of the ribosome sample. (S2-S4)

**Supporting Figure 1:** Mean number of identified CSMs and unique XLs identified at the respective NCE and their average scoring. (S5)

**Supporting Figure 2:** Average Sequence coverage obtained at different NCEs (S6)

**Supporting Figure 3:** Number of reporter doublet containing spectra obtained with CID (30% NCE) and HCD fragmentation applying NCEs ranging from 15-39%. (S7)

**Supporting Figure 4:** Average fragmentation-efficiency obtained at different NCEs (S7)

**Supporting Figure 5:** Investigation into the fragmentation energy dependent identification of DSBU cross-linked peptides (S8)

**Supporting Figure 6:** Comparison of the three most promising stepped collision energies (S9)

**Supporting Figure 7:** Identified cross-linked sites identified in SEC fractions 2 & 3 obtained using the different enzyme(-combinations) and fragmentation strategies (S9)

**Supporting Figure 8:** UV-chromatogram of the SEC-fractionation of the ribosomal sample (S10)

# Supplementary Information

## Supplementary Methods

### Cross-Link Data Analysis using MeroX.

Raw files were converted to.mgf files using Proteome Discoverer 2.2 (PD). For MeroX 1.6.6<sup>1</sup> the following settings were used: Cross-Linker: DSSO (+158.00376 Da, reactivity towards lysine and protein N-terminus); cross-linker fragments: alkene (+54.01056 Da), unsaturated thiol (+85.98264 Da), sulfenic acid (+103.9932 Da); alkene and unsaturated thiol were selected as essential; additionally the RISE Mode was activated to compensate for 1 missing reporter doublet ion; MS1 accuracy: 10 ppm; MS2 accuracy: 20 ppm; used enzyme: trypsin; max. missed cleavages: arginine 3, Lysine 3; minimum peptide length: 5; max. modifications: 2; peptide mass: 300-7000 Da; static modifications: carbamidomethylation (cysteine, +57.021 Da); dynamic modifications: oxidation (methionine, +15.995 Da). For the database search the false discovery rate (FDR) was set to 1 %.

### Investigations on DSBU cross-linked peptides

BSA (1 mg/ml) was cross-linked with 500  $\mu$ M DSBU for 30 minutes at room-temperature. The sample was further processed, as described for DSSO cross-linked proteins. Cross-links were analyzed on a QExactive HF-X mass spectrometer applying the previously published MS-method using HCD with 30 $\pm$ 3 % NCE.<sup>1</sup> Digested peptides were separated using a Dionex UltiMate 3000 HPLC RSLC nanosystem prior to MS analysis. The HPLC was interfaced with the mass spectrometer via a Nanospray Flex<sup>TM</sup> ion source. For sample concentrating, washing and desalting, the peptides were trapped on an Acclaim PepMap C-18 precolumn (0.3x5mm, Thermo Fisher Scientific), using a flowrate of 25  $\mu$ l/min and 100% buffer A (99.9% H<sub>2</sub>O, 0.1% TFA). The separation was performed on an Acclaim PepMap C-18 column (50 cm x 75  $\mu$ m, 2  $\mu$ m particles, 100 Å pore size, Thermo Fisher Scientific) applying a flowrate of 230 nl/min. For separation, a

90 minutes solvent gradient ranging from 2-35% buffer B (80% ACN, 19.92% H<sub>2</sub>O, 0.08% TFA) was applied. Mass spectra were recorded as follows: Full scan: 60000 resolution; AGC target 1e6; 60 ms max. injection time; from 350-1500 m/z. MS/MS-spectra: 30000 resolution; AGC target 5e4; 150 ms max. injection time; from 200-2000 m/z, 3.3e4 intensity threshold. The top 15 most intense ions with charge state >2+ were selected for fragmentation and subsequently excluded for 30 seconds. For identification XLinkX 2.2 was used.<sup>2</sup>

Identified cross-links were put onto an inclusion list using the Proteome Discoverer 2.2 output. To investigate the NCE dependence of DSBU cross-links, the same mass spectrometer settings as described for DSSO cross-linked peptides (see Material and Methods) and the freshly generated inclusion list were used.

For XLinkX the following settings have been used: Cross-Linker: DSBU (+196.084792 Da, reactivity towards lysine); cross-linker fragments: Bu (+85.05276 Da), UrBu (+111.03203 Da), cross-link doublets: Bu/UrBu ( $\Delta$ -mass 25.9793 Da); MS1 accuracy: 10 ppm; MS2 accuracy: 20 ppm; used enzyme: trypsin; max. missed cleavages: 4; minimum peptide length: 5; max. modifications: 4; peptide mass: 300-7000 Da; static modifications: carbamidomethylation (cysteine, +57.021 Da); dynamic modifications: oxidation (methionine, +15.995 Da). For the database search the false discovery rate (FDR) was set to 1%.

#### **Identification of cross-linked peptides derived from conalbumin, ovalbumin and alcohol dehydrogenase**

For the identification of DSSO cross-links of the three mentioned proteins, the same MS-settings as described for BSA cross-linked with DSBU were used, but HCD fragmentation using a stepped collision energy of 21±6 % NCE was used. Cross-links were identified using XLinkX 2.2.<sup>2</sup>

#### **Shotgun Analysis of the Ribosome Sample.**

The ribosome sample was digested as described for the cross-linked samples. The digest was separated using a Dionex UltiMate 3000 HPLC RSLC nanosystem prior to MS analysis. The HPLC was interfaced with the mass spectrometer via a Nanospray Flex™ ion source. For sample concentrating, washing and desalting, the peptides were trapped on an Acclaim PepMap C-18 precolumn (0.3x5mm, Thermo Fisher Scientific), using a flowrate of 25  $\mu$ l/min and 100% buffer A (99.9% H<sub>2</sub>O, 0.1% TFA). The separation was performed on an Acclaim PepMap C-

18 column (50 cm x 75  $\mu$ m, 2  $\mu$ m particles, 100 Å pore size, Thermo Fisher Scientific) applying a flowrate of 230 nl/min. For separation, a solvent gradient ranging from 2-35% buffer B (80% ACN, 19.92% H<sub>2</sub>O, 0.08% TFA) over 3h was applied. Mass spectra were acquired on a QExactive HF Orbitrap-MS. Full scans were recorded at a resolution of 60000 ranging from 380-1500 m/z (AGC 1e6, max injection time 60 ms). MS/MS scans of the top 10 most intense ions with charge state 2-6+ were recorded at a resolution of 30000 ranging from 200-2000 m/z (AGC 1e5, max injection time 105 ms). Selected precursors were fragmented using HCD with a normalized collision energy (NCE) of 27 %. The Minimum AGC target was set to 5e3 with an intensity threshold of 4.8e4. Ions that have been selected for fragmentation have been excluded from MS/MS for 60 seconds.

The obtained .raw file was analyzed in PD 2.1 using MS-Amanda 2.2<sup>3</sup> and apQuant<sup>4</sup> using the following settings: MS1 accuracy: 5 ppm; MS2 accuracy: 10 ppm; used enzyme: trypsin; max. missed cleavages: 2; max. modifications: 4; peptide mass: 350-5000 Da; static modifications: carbamidomethylation (cysteine, +57.021 Da); dynamic modifications: oxidation (methionine, +15.995 Da). For FDR calculation Percolator was used with a target FDR of 1%. For apQuant 5ppm mass tolerance and PSM confidence level “High” with a minimum score of 150 and a minimum peptide length of 7 was used. For protein quantification the iBAQ option was used.

For the generation of the FASTA file for cross-link search, all protein that were at least “Master Candidate” and had at least 2 identified peptides were considered.

## Supplementary Figures:

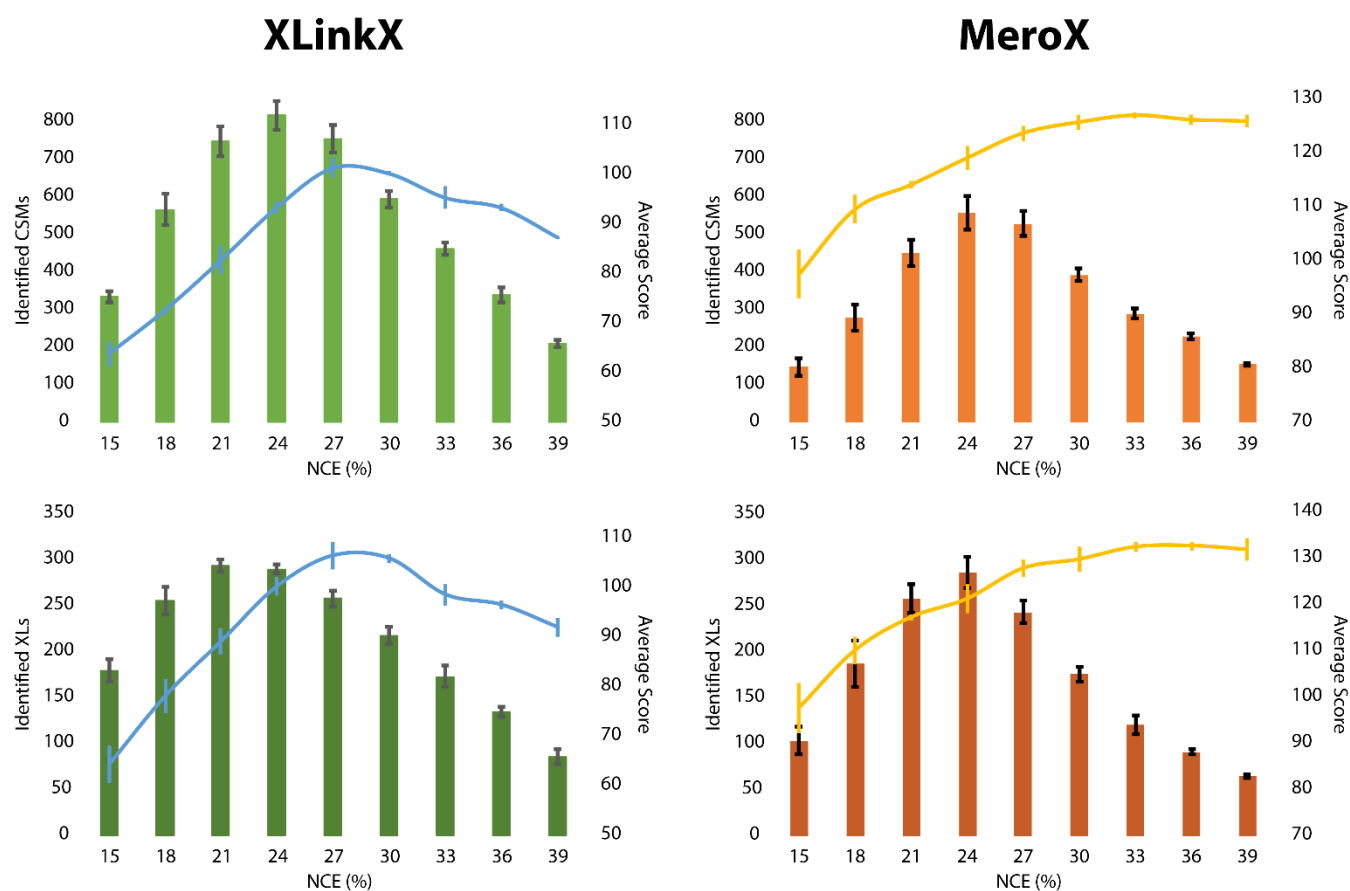

**Figure S1:** Mean number of identified cross-link spectrum matches (CSMs), unique cross-linked sites (XLS) identified at the respective NCE and their average scoring.  
(n=3, Error = 0.95 confidence interval [CI])

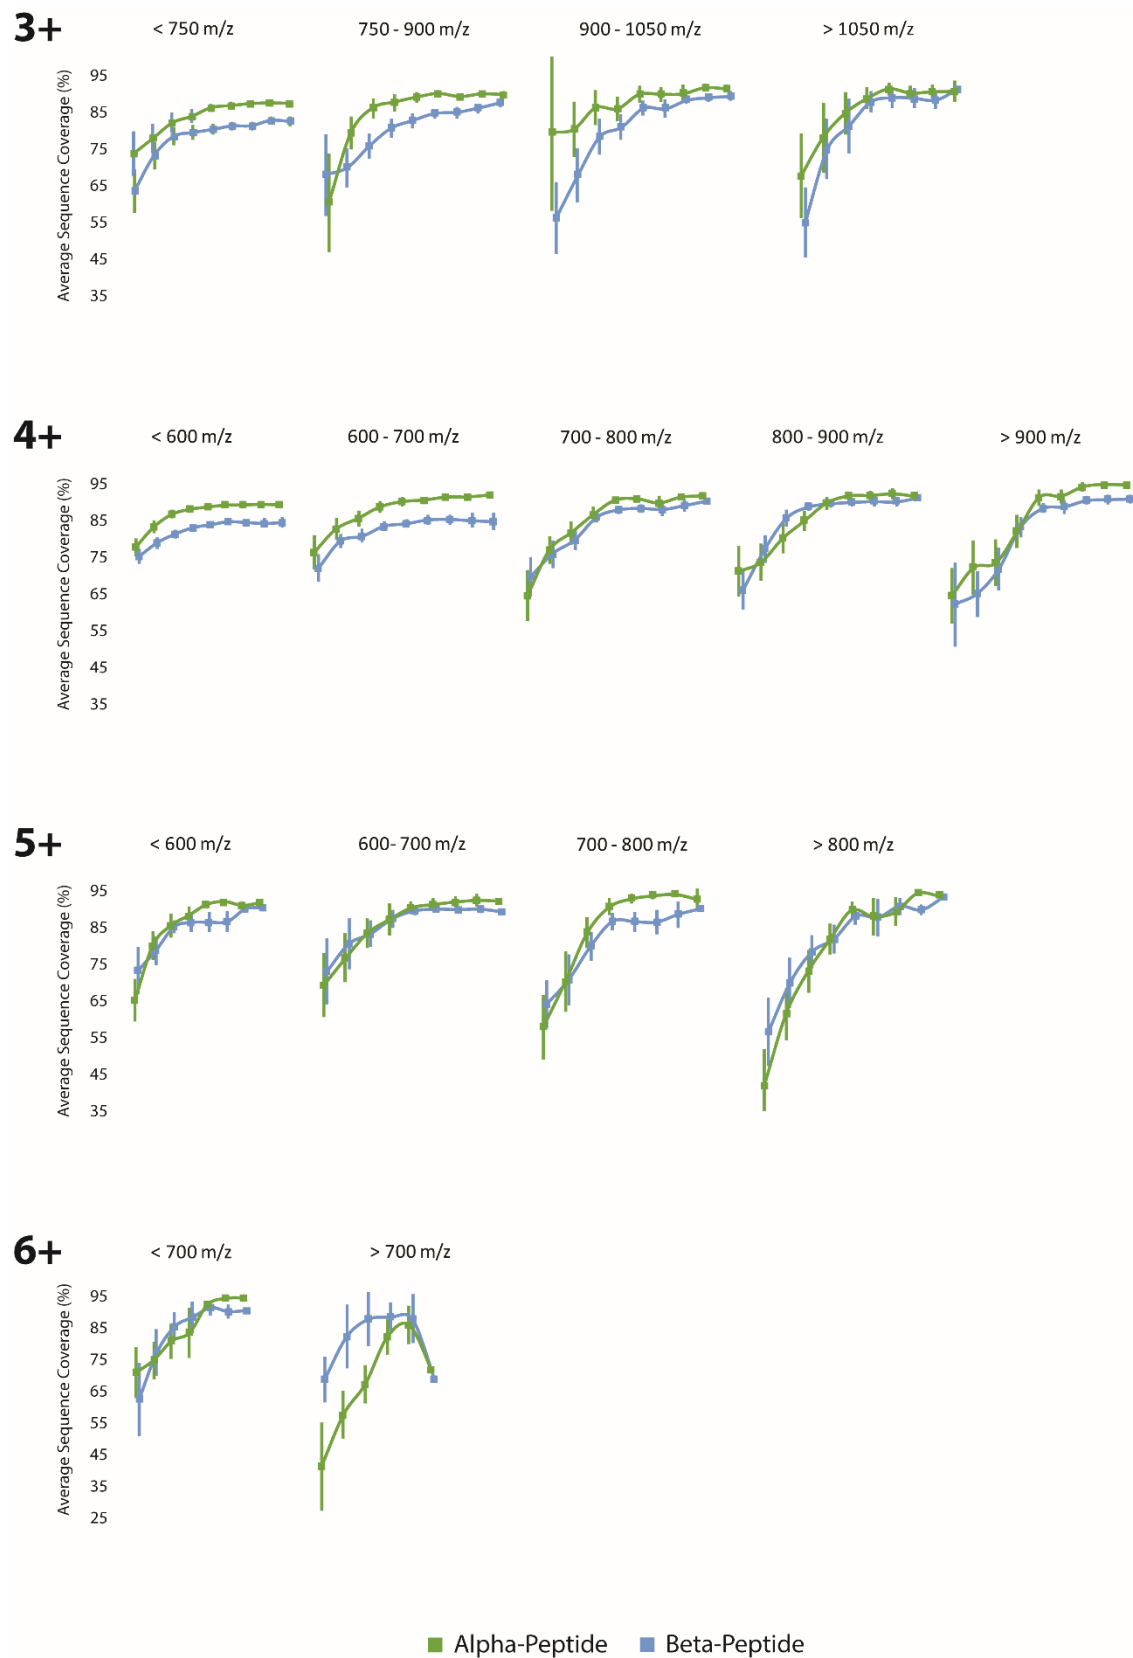

**Figure S2:** Average Sequence coverage obtained at different NCEs, for different m/z and z ranges. Error bars represent the 0.95 CI

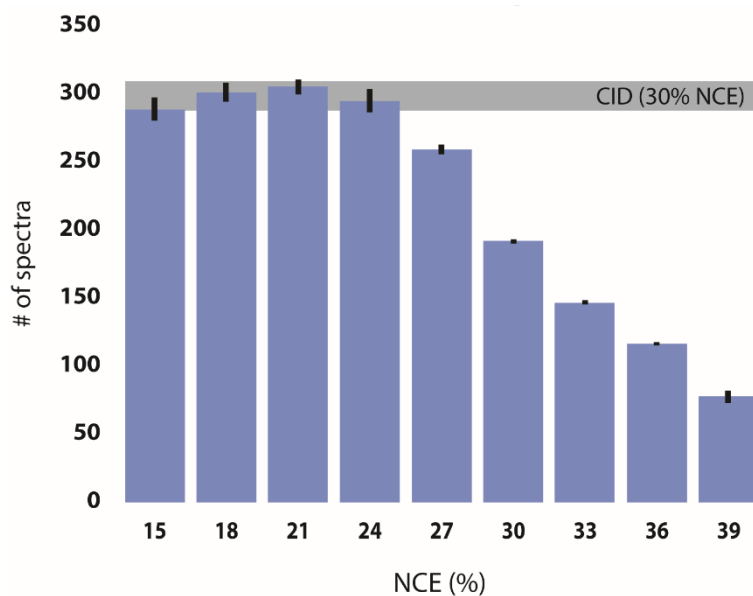

**Figure S3:** Number of reporter doublet containing spectra obtained with CID fragmentation (30% NCE) and HCD fragmentation applying NCEs ranging from 15-39%. (n=3, Error = 0.95 CI)

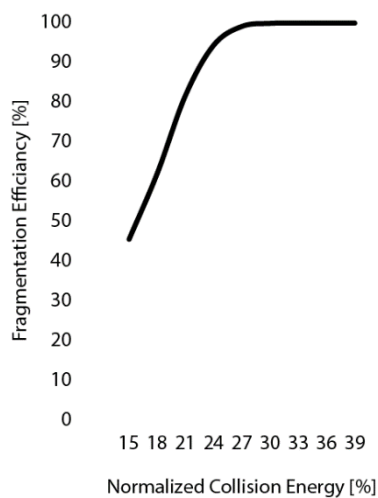

**Figure S4:** Average fragmentation-efficiency obtained at different NCEs

## XLinkX

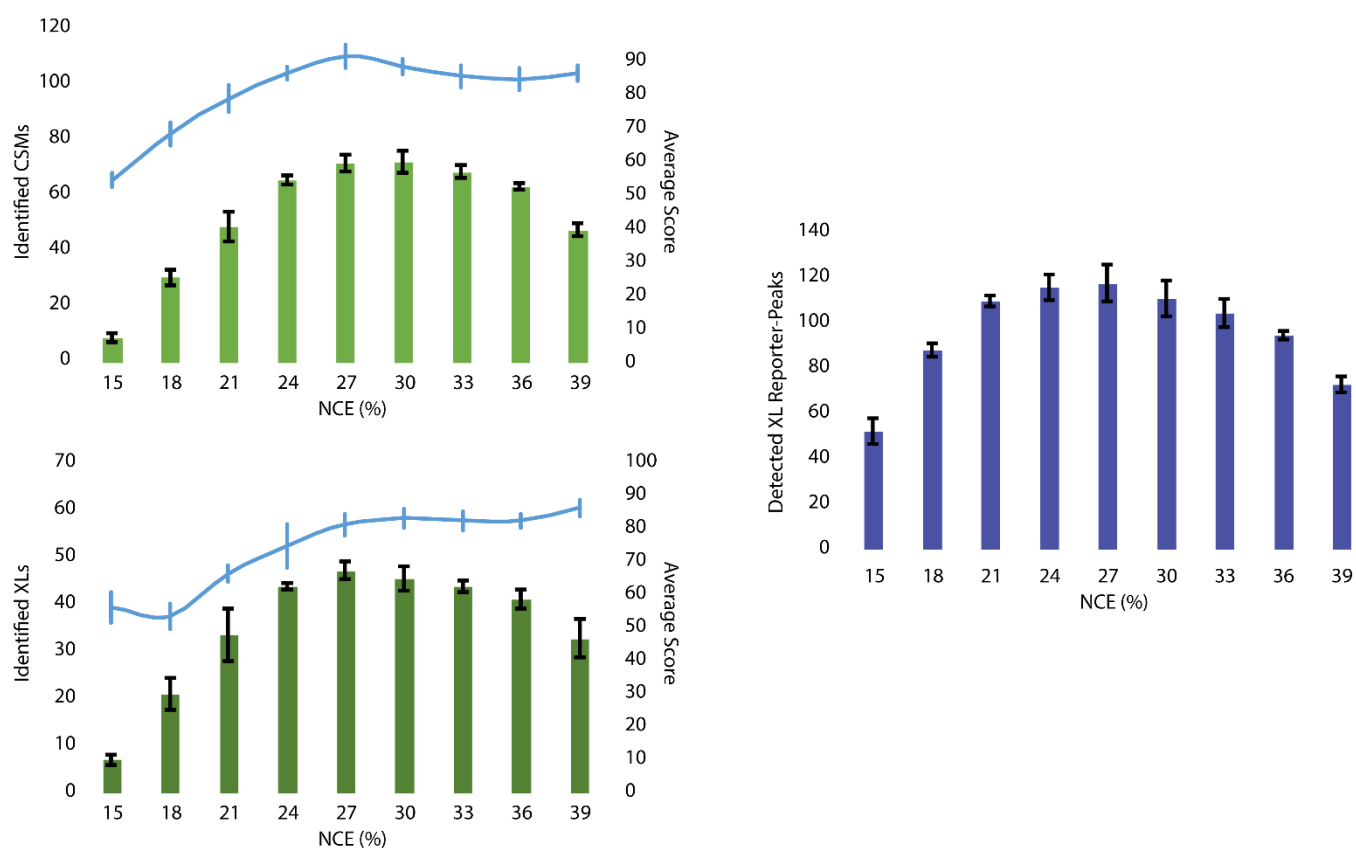

**Figure S5:** Investigation into the fragmentation energy dependent identification of disuccinimidyl dibutyric urea (DSBU) cross-linked peptides and the likelihood for reporter doublet formation. (n=3, Error = 0.95 CI). Data was analyzed using XLinkX 2.2.



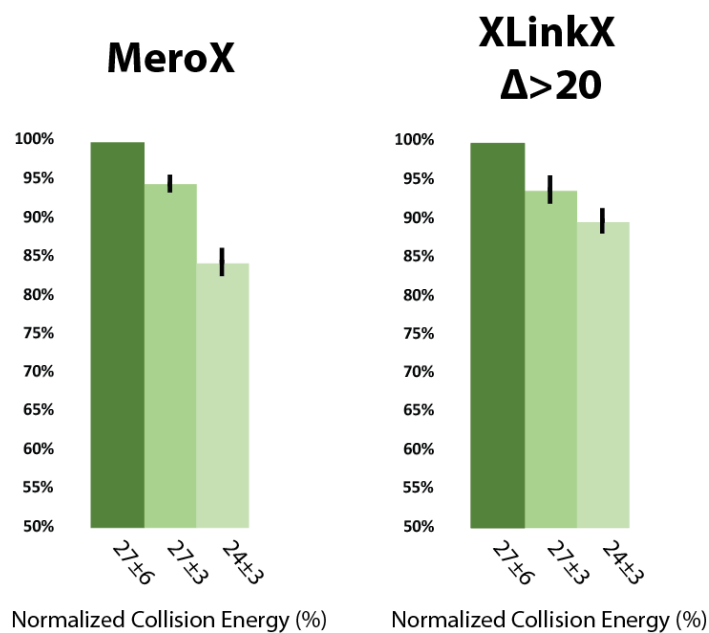

**Figure S6:** Comparison of the three most promising stepped collision energies in terms of identified spectra using the different search engines (Normalized on the number of CSMs obtained with 27±6 & NCE, n = 3, Error = 0.95 CI).

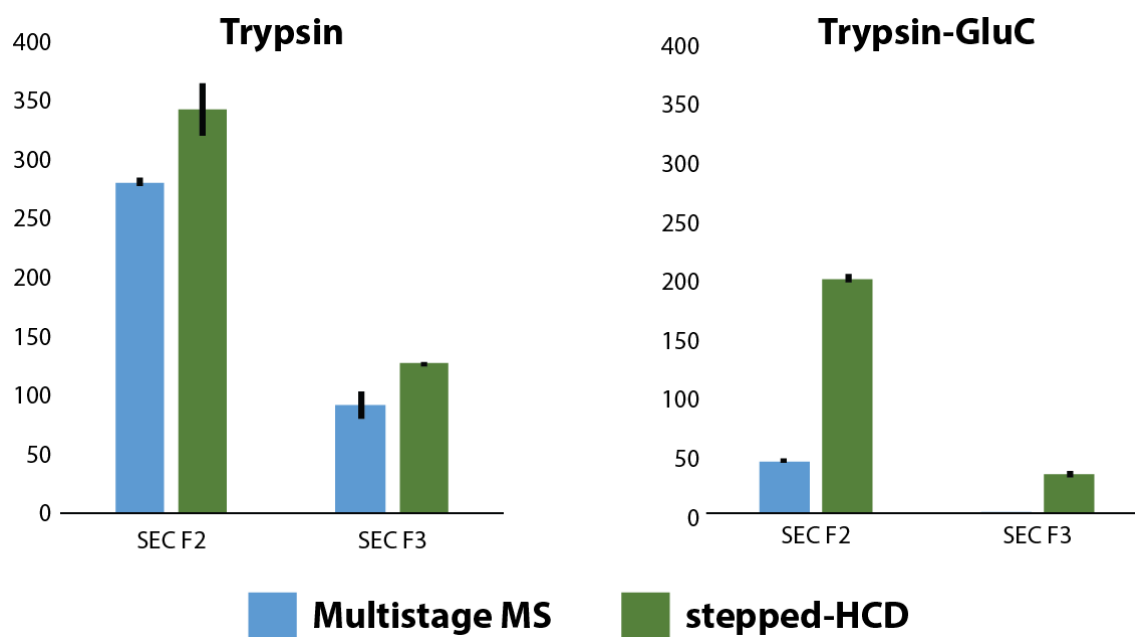

**Figure S7:** Identified cross-linked sites identified in SEC fractions 2 & 3 obtained using the different enzyme(-combinations) and fragmentation strategies, respectively. (n = 3, Error = 0.95 CI)

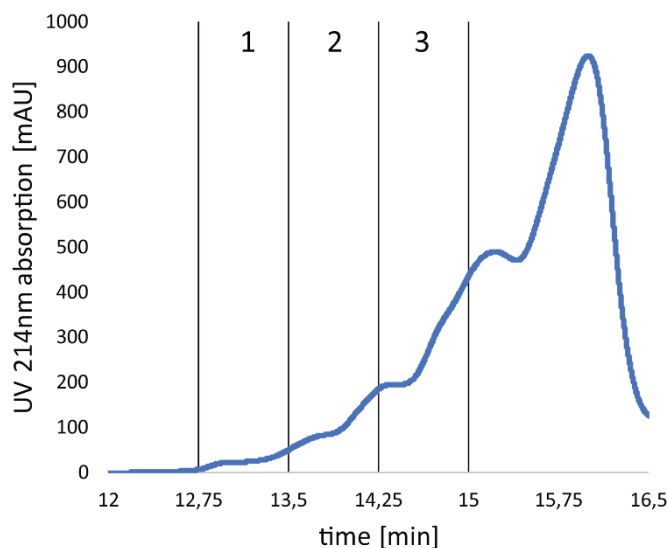

**Figure S8:** UV-chromatogram of the SEC-fractionation of the ribosomal sample indicating the three analyzed fractions.

## References

- (1) Arlt, C.; Götze, M.; Ihling, C. H.; Hage, C.; Schäfer, M.; Sinz, A. Integrated Workflow for Structural Proteomics Studies Based on Cross-Linking/Mass Spectrometry with an MS/MS Cleavable Cross-Linker. *Anal. Chem.* **2016**, *88* (16), 7930–7937. <https://doi.org/10.1021/acs.analchem.5b04853>.
- (2) Liu, F.; Lössl, P.; Scheltema, R.; Viner, R.; Heck, A. J. R. Optimized Fragmentation Schemes and Data Analysis Strategies for Proteome-Wide Cross-Link Identification. *Nat. Commun.* **2017**, *8*, 15473.
- (3) Dorfer, V.; Pichler, P.; Stranzl, T.; Stadlmann, J.; Taus, T.; Winkler, S.; Mechtler, K. MS Amanda, a Universal Identification Algorithm Optimized for High Accuracy Tandem Mass Spectra. *J. Proteome Res.* **2014**, *13* (8), 3679–3684. <https://doi.org/10.1021/pr500202e>.
- (4) Doblmann, J.; Dusberger, F.; Imre, R.; Hudecz, O.; Stanek, F.; Mechtler, K.; Dürnberger, G. apQuant: Accurate Label-Free Quantification by Quality Filtering. *J. Proteome Res.* **2019**, *18* (1), 535–541. <https://doi.org/10.1021/acs.jproteome.8b00113>.
